# Supplementary material for: Comprehensive pan-cancer analysis on CBX3 as a prognostic and immunological biomarker
Source: Springer Nature journal article supplement (doi:10.1186/s12920-022-01179-y), 2022-02-16
Supplement: MOESM2 [file 12920_2022_1179_MOESM2_ESM.pdf]

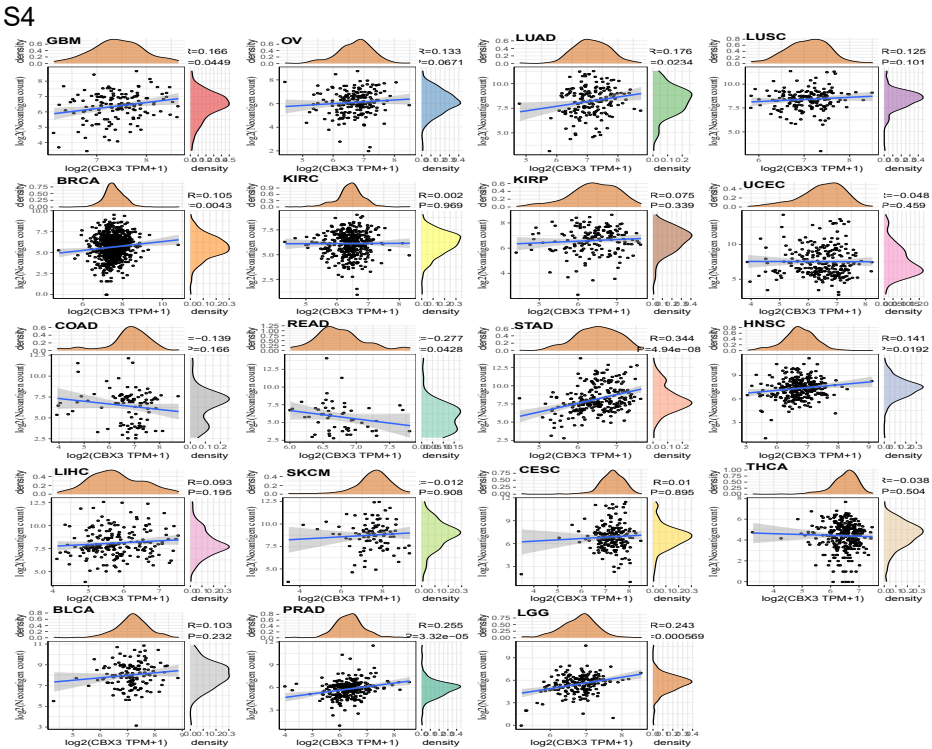

S4: The relationship between CBX3 expression and neoantigen in different tumors

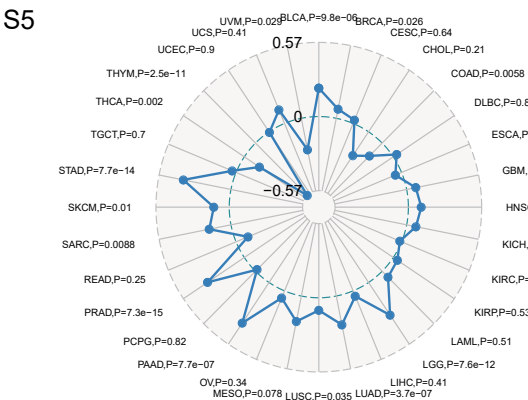

S5: The relationship between CBX3 expression and TMB with spearman rank correlation coefficient in radar chart

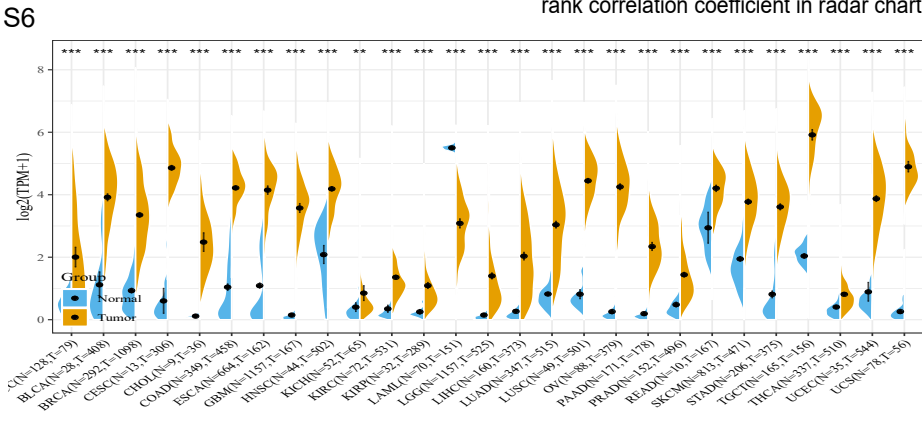

S6: The difference in CENPA expression between cancer and adjacent tissue in each tumor sample
